# Supplementary material for: Computed Tomography-Based Quantitative Texture Analysis and Gut Microbial Community Signatures Predict Survival in Non-Small Cell Lung Cancer
Source: MDPI journal article supplement (doi:10.3390/cancers15205091), 2023-10-21
Supplement: s1 [file s1]

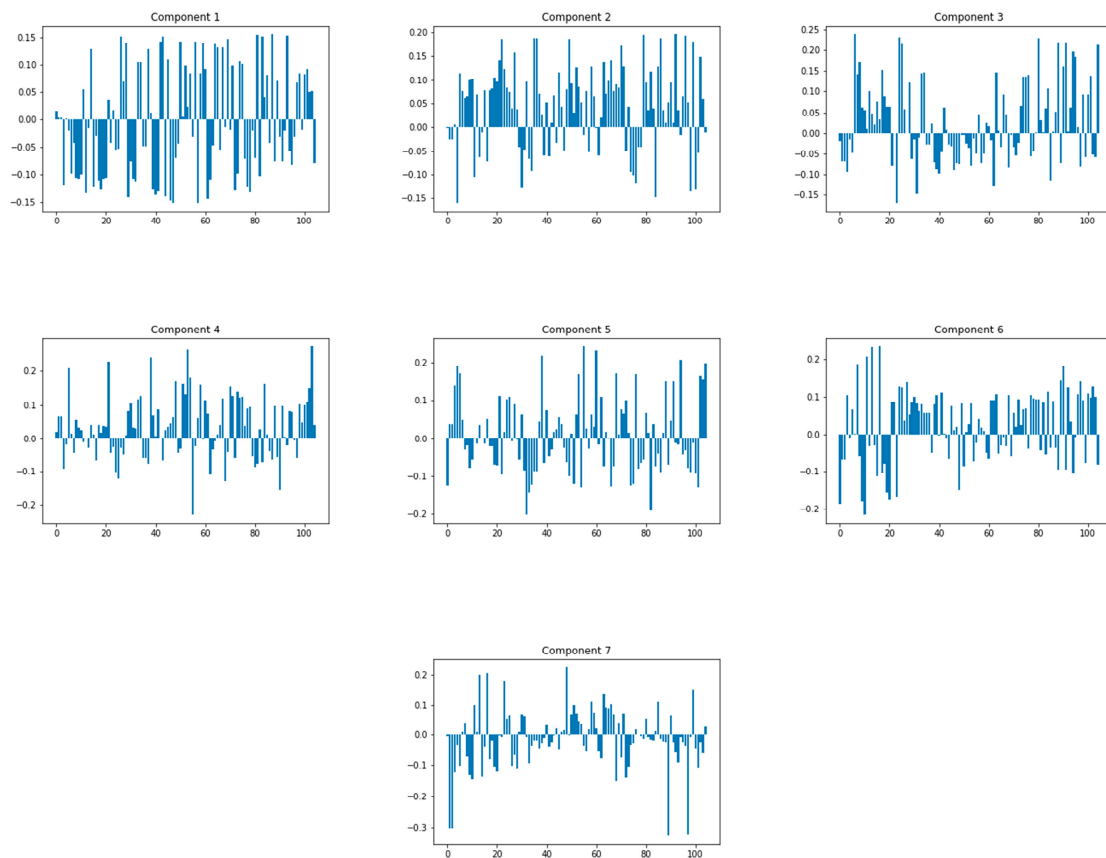

**Supplementary Figure S1.** Contribution of the 105 QTA features to Principal Components generated by PCA.

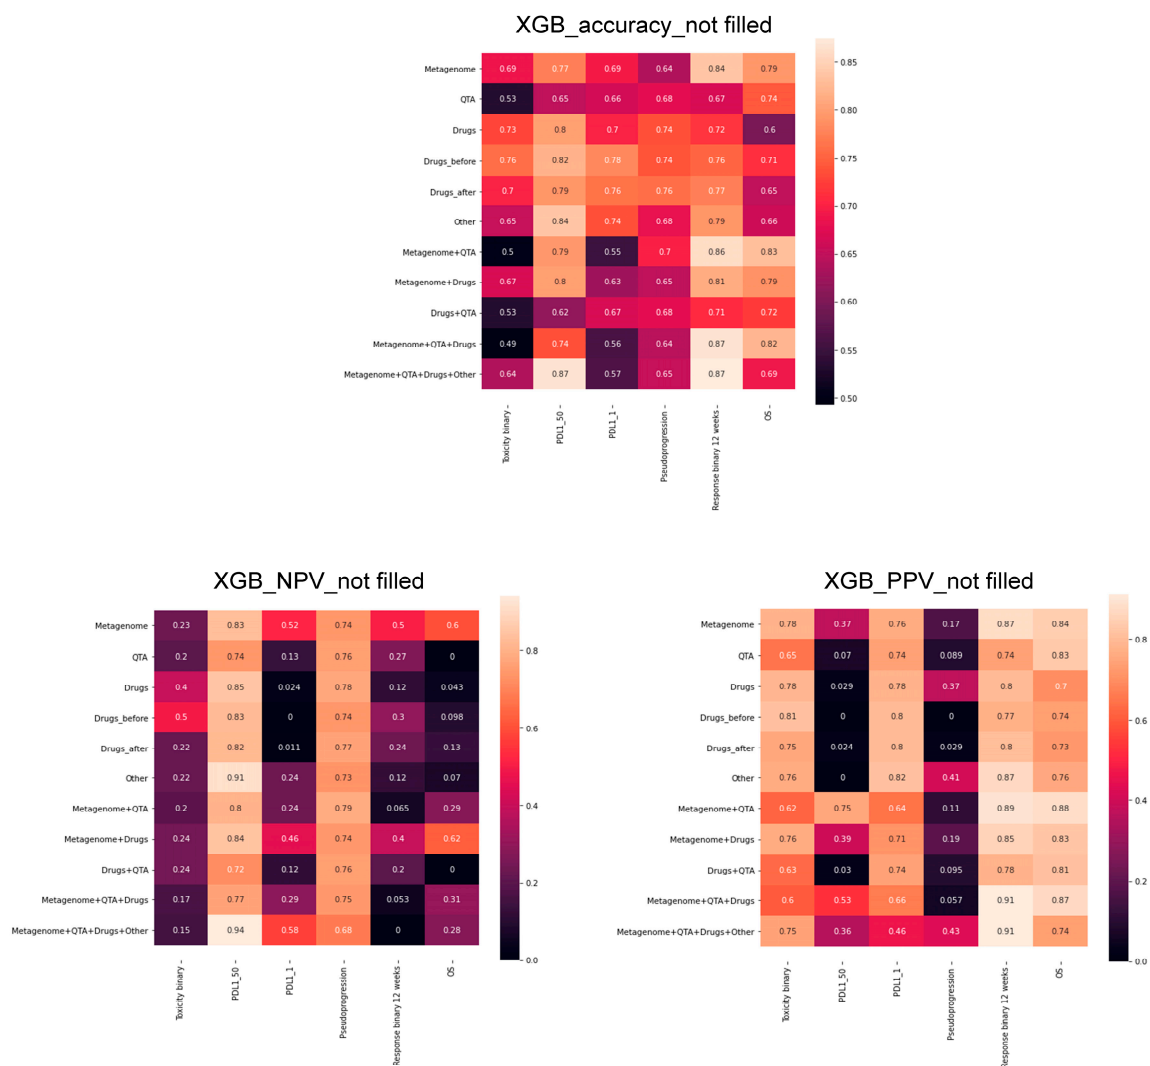

**Supplementary Figure S2:** Accuracy, PPV and NPV of the XGB machine learning algorithm used in predicting outcomes according to clinicopathological signatures of patients: not-filled data.

**Table S1. Most abundant OTUs in Long vs Short OS patients**

| <b>OS group</b> | <b>Kingdom</b> | <b>Taxon level</b> | <b>Taxon</b>                 | <b>Log Fc</b> | <b>p-value</b> |
|-----------------|----------------|--------------------|------------------------------|---------------|----------------|
| Long OS         | bacteria       | speces             | Parabacteroides distasonis   | 3.56          | 0.00699        |
| Long OS         | bacteria       | species            | Bacteroides dorei            | 1.11          | 0.00851        |
| Long OS         | fungi          | species            | Pezoloma ericae              | 0.12          | 0.00849        |
| Short OS        | bacteria       | species            | Clostridium perfringens      | -3.43         | 0.00525        |
| Short OS        | bacteria       | species            | Enterococcus faecium         | -1.72         | 0.00015        |
| Short OS        | bacteria       | species            | Clostridium celatum          | -1.32         | 0.00367        |
| Short OS        | fungi          | species            | Cortinarius davemallochii    | -11.73        | 0.00262        |
| Short OS        | fungi          | class              | Tremellomycetes unclassified | -9.3          | 0.00618        |
| Short Os        | fungi          | species            | Helotiales                   | -7.61         | 0.00304        |
| Short OS        | fungi          | species            | Chaetosphaeriales            | -7.22         | 0.00154        |
| Short OS        | fungi          | order              | Trechisporales unclassified  | -6.11         | 0.00155        |
| Short OS        | fungi          | family             | Thelephoraceae unclassified  | -5.74         | 0.00355        |
| Short OS        | fungi          | genus              | Hyphodiscus unclassified     | -5.11         | 0.00134        |
| Short OS        | fungi          | genus              | Coniochaeta unclassified     | -4.5          | 0.00726        |
| Short OS        | fungi          | species            | Arachnopeziza aurelia        | -4.44         | 0.00143        |

|          |       |         |                              |       |         |
|----------|-------|---------|------------------------------|-------|---------|
| Short OS | fungi | species | Serendipitaceae              | -4.06 | 0.0064  |
| Short OS | fungi | species | Clavaria argillacea          | -4.06 | 0.00048 |
| Short OS | fungi | family  | Lichtheimiaceae unclassified | -2.74 | 0.0049  |
| Short OS | fungi | species | Meliniomyces variabilis      | -2.23 | 0.00412 |
| Short OS | fungi | order   | Helotiales unclassified      | -1.43 | 0.00884 |
| Short OS | fungi | species | Acephala                     | -1.27 | 0.00853 |
| Short OS | fungi | species | Sebacinaceae                 | -0.42 | 0.00456 |

**Table S2. Most abundant OTUs in PD-L1-high vs PD-L1-low patients**

| <b>PD-L1 group</b> | <b>Kingdom</b> | <b>Taxon level</b> | <b>Taxon</b>                | <b>Log FC</b> | <b>p-value</b> |
|--------------------|----------------|--------------------|-----------------------------|---------------|----------------|
| High               | bacteria       | species            | Enterococcus avium          | 4.35          | 0.00325        |
| High               | bacteria       | species            | Streptococcus tigurinus     | 2.78          | 0.00613        |
| High               | fungi          | species            | Hymenoscyphus immutabilis   | 7.56          | 0.00154        |
| High               | fungi          | species            | Clavulinopsis fusiformis    | 6.25          | 0.00898        |
| High               | fungi          | family             | Montagnulaceae unclassified | 4.44          | 0.00384        |
| Low                | bacteria       | species            | Lachnospiraceae bacterium   | -0.31         | 0.00134        |
| Low                | bacteria       | species            | Dorea formicigenerans       | -2.59         | 0.00029        |

**Table S3. Most abundant OTUs in Toxicity vs No-Toxicity patients**

| <b>Toxicity group</b> | <b>Kingdom</b> | <b>Taxon level</b> | <b>Taxon</b>                 | <b>Log FC</b> | <b>p-value</b> |
|-----------------------|----------------|--------------------|------------------------------|---------------|----------------|
| Toxicity              | bacteria       | species            | Lachnospiraceae bacterium    | 4.84          | 0.00691        |
| Toxicity              | fungi          | family             | Thelephoraceae unclassified  | 8.48          | 0.03463        |
| No-toxicity           | bacteria       | species            | Subdoligranulum              | -2.71         | 0.03722        |
| No-toxicity           | bacteria       | species            | Pyramidobacter piscolens     | -3.78         | 0.03132        |
| No-toxicity           | bacteria       | species            | Streptococcus lutetiensis    | -7.13         | 0.01127        |
| No-toxicity           | fungi          | species            | Amanita altipes              | -2.32         | 0.02023        |
| No-toxicity           | fungi          | genus              | Psathyrella unclassified     | -2.58         | 0.02175        |
| No-toxicity           | fungi          | species            | Debaryomyces vindobonensis   | -2.95         | 0.00779        |
| No-toxicity           | fungi          | species            | Rozellomycota                | -5.36         | 0.02083        |
| No-toxicity           | fungi          | species            | Cutaneotrichosporon cutaneum | -5.93         | 0.01314        |

**Table S4:** Spearman's correlation coefficients and p-values of key microbial taxa, clinicopathological parameters and PCs from QTA analyses (*attached as excel*)**Table S5:** 105 QTA parameters and their contribution to the 7 PCs generated by PCA. (*attached as excel*)
